# Supplementary material for: Wearable super-high specific performance supercapacitors using a honeycomb with folded silk-like composite of NiCo2O4 nanoplates decorated with NiMoO4 honeycombs on nickel foam
Source: Royal Society of Chemistry journal article supplement (doi:10.1039/c8dt03598a), 2018-01-01
Supplement: c8dt03598a1.pdf [file c8dt03598a1.pdf]

## Supplementary material

# **Wearable super-high specific performance supercapacitors using a honeycomb with folded silk-like composite by NiCo<sub>2</sub>O<sub>4</sub> nanoplates decorated with NiMoO<sub>4</sub> honeycombs**

Yedluri Anil Kumar\* and Hee-Je Kim

<sup>a</sup> School of Electrical Engineering, Pusan National University, Busandaehak-ro 63beon-gil,  
Geumjeong-gu, Busan, 46241, Rep. of KOREA

\*Corresponding Author. Tel: +82 51 510 2364. Fax: +82 51 513 0212.

E-mail: [heeje@pusan.ac.kr](mailto:heeje@pusan.ac.kr) (H.-J. Kim); [yedluri.anil@gmail.com](mailto:yedluri.anil@gmail.com) (A. K. Yedluri)

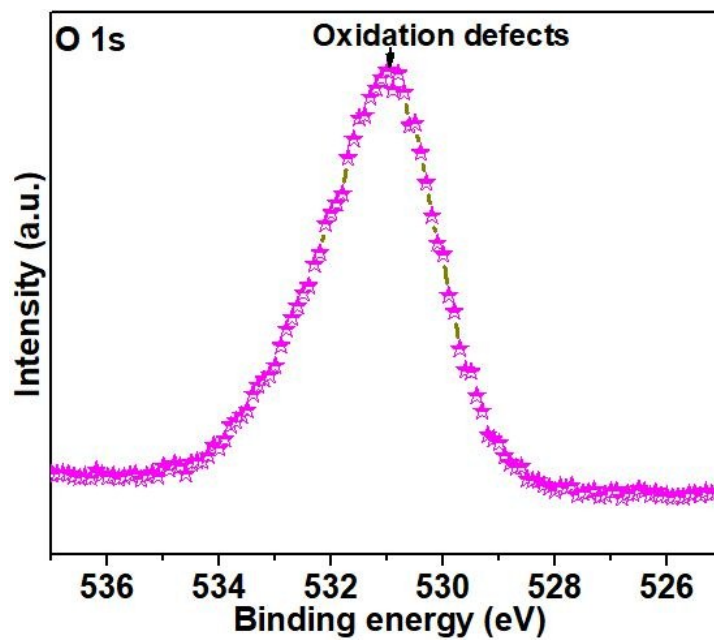

**Fig. S1** XPS spectra of O 1s material.

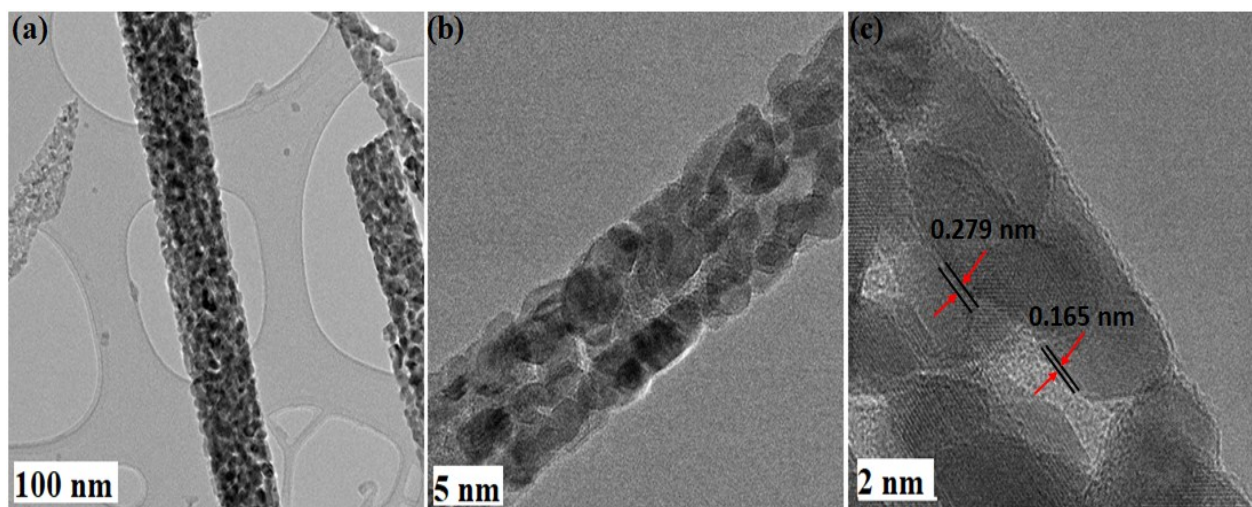

**Fig. S2** TEM and HR-TEM images of NCO nanoplate's structure.

**Table S1** Comparison of maximum specific capacitance of NF@NMO@NCO with recent reported literatures

| <b>Electrode</b>                                                              | <b>Current density<br/>(A g<sup>-1</sup>, mA g<sup>-2</sup>)</b> | <b>Specific<br/>Capacitance (F g<sup>-1</sup>)</b> | <b>Reference</b> |
|-------------------------------------------------------------------------------|------------------------------------------------------------------|----------------------------------------------------|------------------|
| NiCo <sub>2</sub> O <sub>4</sub> @NiMoO <sub>4</sub> nanosphere               | 2 A g <sup>-1</sup>                                              | 1597 F g <sup>-1</sup>                             | 1                |
| NiCo <sub>2</sub> O <sub>4</sub> @NiCo <sub>2</sub> O <sub>4</sub> nanoflake  | 5 mA cm <sup>-2</sup>                                            | 1115.6 F g <sup>-1</sup>                           | 2                |
| NiCo <sub>2</sub> O <sub>4</sub> @NiCo <sub>2</sub> O <sub>4</sub> nanocactus | 2 A g <sup>-1</sup>                                              | 1264 F g <sup>-1</sup>                             | 3                |
| NiCo <sub>2</sub> O <sub>4</sub> @MnMoO <sub>4</sub> core-shell flowers       | 1 A g <sup>-1</sup>                                              | 1118 F g <sup>-1</sup>                             | 4                |
| NiCo <sub>2</sub> O <sub>4</sub> @graphene nano-architechure                  | 1 A g <sup>-1</sup>                                              | 778 F g <sup>-1</sup>                              | 5                |
| NiCo <sub>2</sub> O <sub>4</sub> hallow microsphere                           | 2 A g <sup>-1</sup>                                              | 764 F g <sup>-1</sup>                              | 6                |
| <b>NF@NMO@NCO Honeycomb with<br/>folded silk-like structure</b>               | <b>20 mA g<sup>-2</sup></b>                                      | <b>2695 F g<sup>-1</sup></b>                       | <b>This work</b> |

## References

1. M. Yao, Z. Hu, Y. Liu and P. Liu, *New J. Chem.*, 2015, **39**, 8430.
2. X. Y. Liu, S. J. Shi, Q. Q. Xiong, L. Li, Y. J. Zhang, H. Tang, C. D. Gu, X. L. Wang and J. P. Tu, *ACS Appl. Mater. Interfaces*, 2013, **5**, 8790.
3. J. Cheng, Y. Lu, K. Qiu, H. Yan, J. Xu, L. Han, X. Liu, J. Luo, J. K. Kim and Y. Luo, *SCIENTIFIC REPORTS*, 2015, **5**, 12099.
4. Z. Gu and X. Zhang, *J. Mater. Chem. A*, 2016, **4**, 8249.
5. Y. Y. Wei, S. Q. Chen, D. W. Su, B. Sun, J. G. Zhu and G. X. Wang, *J. Mater. Chem. A*, 2014, **2**, 8103-8109.

6. Y. Zhu, X. Ji, R. Yin, Z. Hu, X. Qiu, Z. Wu and Y. Liu, *RSC Adv.*, 2017, 7, 11123.
